# Supplementary material for: Methodological weaknesses in the measurement approaches and concept of housing affordability used in housing research: A qualitative study
Source: PubMed Central journal article supplement (PMC6716639; doi:10.1371/journal.pone.0221246), 2019-08-30
Supplement: pone.0221246.s001.pdf [file pone.0221246.s001.pdf]

# Methodological Weaknesses in the Measurement Approaches and Concept of Housing Affordability used in Housing Research: A Qualitative Study

## Supplementary Data

**S1 Table: Review Design**

| Criteria for Exclusion and Inclusion |                                                                                                                                                                | Source of Data                                                                                                                                                                                           | Data Collection Technique       | Databases                                                                                                                                                  |
|--------------------------------------|----------------------------------------------------------------------------------------------------------------------------------------------------------------|----------------------------------------------------------------------------------------------------------------------------------------------------------------------------------------------------------|---------------------------------|------------------------------------------------------------------------------------------------------------------------------------------------------------|
| Exclusion                            |                                                                                                                                                                | Inclusion                                                                                                                                                                                                |                                 |                                                                                                                                                            |
| Timeline                             | Not Within 2000 – 2018                                                                                                                                         | Within 2000 – June, 2018                                                                                                                                                                                 |                                 |                                                                                                                                                            |
| Nature of Publication                | Non-Peer Reviewed publications, Book Chapters, Book Reviews, Non-Empirical articles, Monographs, News items, Duplicates, Editorials and Encyclopedia articles. | Peer-Reviewed publications and Reports of Empirical Studies.                                                                                                                                             | Print (Hard);<br>Online (Soft). | Title, Abstract, Keywords, Key arguments, Research methodologies, Conclusions and Findings.<br>Web of Science, Google Scholar, Springer, ProQuest Central. |
| Theme                                | Regression Models and Econometric Analysis Approaches, as well as Indexes formulated by professional bodies.                                                   | Normative methods, Basic Measurements Approaches and Concepts of Housing Affordability, as well as Mathematical Models (basically adaptations from the basic approaches with more robust methodologies). |                                 |                                                                                                                                                            |
| Language                             | Non-English Publications                                                                                                                                       | English or Translated in English                                                                                                                                                                         |                                 |                                                                                                                                                            |
| Search Scope                         | Multidisciplinary and Wide-ranging                                                                                                                             |                                                                                                                                                                                                          |                                 |                                                                                                                                                            |
| Search method                        | Verbatim, Boolean and Word Combination                                                                                                                         |                                                                                                                                                                                                          |                                 |                                                                                                                                                            |
